# Supplementary material
Source: Springer Nature journal article supplement (https://www.springermedizin.de/resource/supplementary/12891_2009_729_MOESM2_ESM.pdf/9506276)

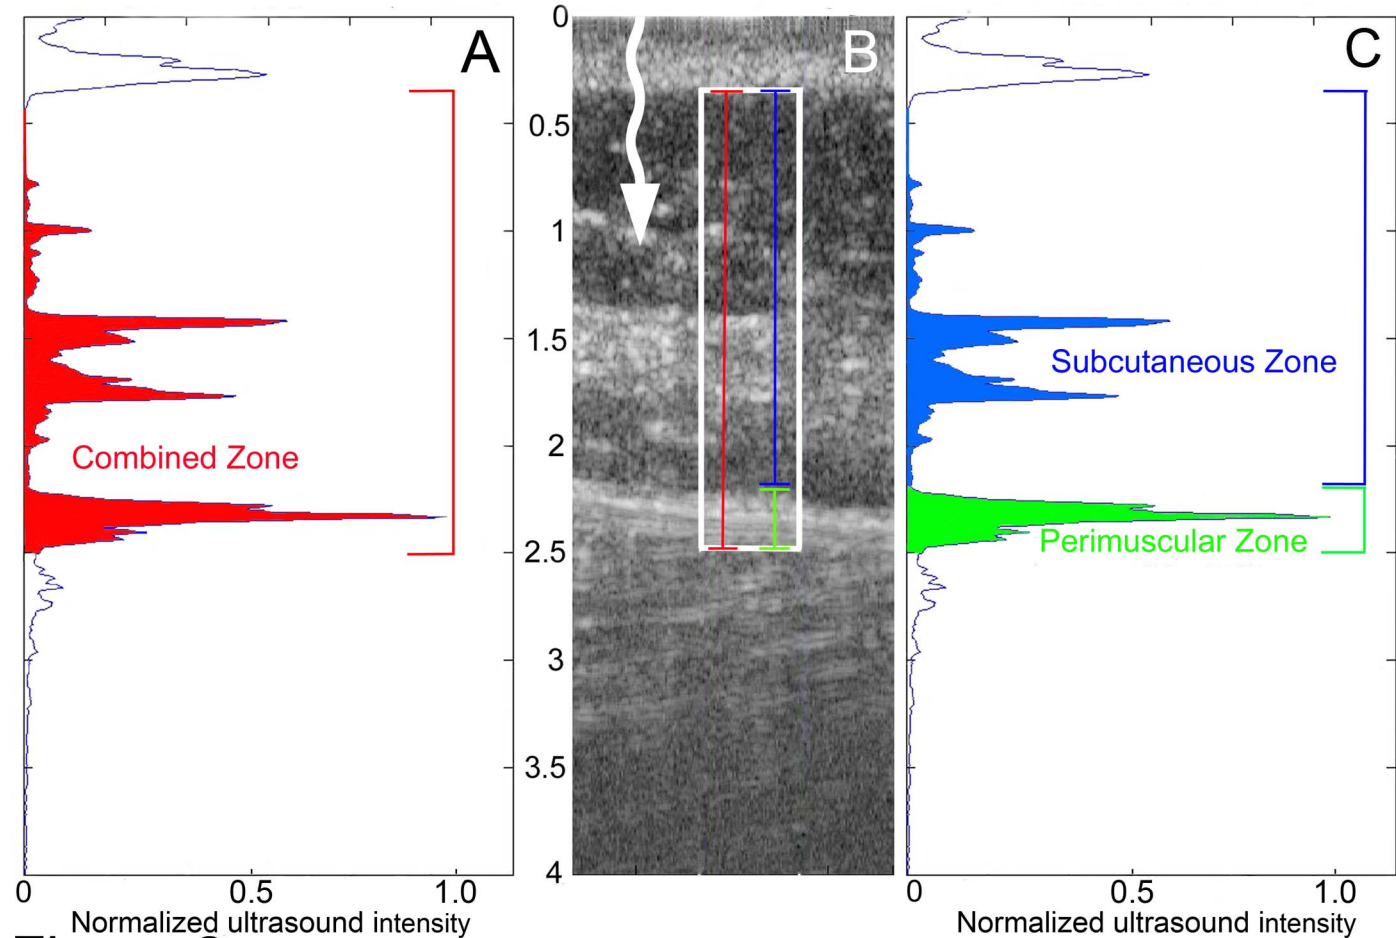

Supplement: MOESM2 [file 9506276]
